1 A Functional Schizophrenia-associated genetic variant near the *TSNARE1* and *ADGRB1* genes.

2

3 Marah H. Wahbeh\*<sup>1</sup>, Rachel J. Boyd\*<sup>1</sup>, Christian Yovo<sup>1</sup>, Bailey Rike<sup>1</sup>, Andrew S. McCallion<sup>1,2</sup>, and Dimitrios

4 Avramopoulos<sup>1,\*</sup>

5 1. McKusick-Nathans Department of Genetic Medicine, Johns Hopkins University School of Medicine,

6 Baltimore, MD 21205, USA;

7 2. Department of Medicine, Johns Hopkins University School of Medicine, Baltimore, MD 21205, USA

8 \* Equal contributors

9 • Corresponding Author

10

11

12

13

14

15

16

17

18

19

20

21 KEYWORDS: gene regulation, genome editing, CRISPR, genetic association, schizophrenia, psychosis,

22 *TSNARE1*, *ADGRB1*, synapse, neurons, axons, neurodevelopment, zebrafish, induced pluripotent stem

23 cells.

24

25 ABSTRACT

26 Recent collaborative genome wide association studies (GWAS) have identified >200 independent loci  
27 contributing to risk for schizophrenia (SCZ). The genes closest to these loci have diverse functions,  
28 supporting the potential involvement of multiple relevant biological processes; yet there is no direct  
29 evidence that individual variants are functional or directly linked to specific genes. Nevertheless, overlap  
30 with certain epigenetic marks suggest that most GWAS-implicated variants are regulatory. Based on the  
31 strength of association with SCZ and the presence of regulatory epigenetic marks, we chose one such  
32 variant near *TSNARE1* and *ADGRB1*, rs4129585, to test for functional potential and assay differences that  
33 may drive the pathogenicity of the risk allele. We observed that the variant-containing sequence drives  
34 reporter expression in relevant neuronal populations in zebrafish. Next, we introduced each allele into  
35 human induced pluripotent cells and differentiated 4 isogenic clones homozygous for the risk allele and 5  
36 clones homozygous for the non-risk allele into neural precursor cells. Employing RNA-seq, we found that  
37 the two alleles yield significant transcriptional differences in the expression of 109 genes at FDR <0.05 and  
38 259 genes at FDR <0.1. We demonstrate that these genes are highly interconnected in pathways enriched  
39 for synaptic proteins, axon guidance, and regulation of synapse assembly. Exploration of genes near  
40 rs4129585 suggests that this variant does not regulate *TSNARE1* transcripts, as previously thought, but  
41 may regulate the neighboring *ADGRB1*, a regulator of synaptogenesis. Our results suggest that rs4129585  
42 is a functional common variant that functions in specific pathways likely involved in SCZ risk.

43

44

45

46

47

48

## 49 1. INTRODUCTION

50 Schizophrenia (SCZ) is a chronic, neuropsychiatric disorder generally characterized by a set of  
51 symptoms that include delusions and hallucinations; disorganized speech and behavior; and cognitive  
52 impairments, such as mental, emotional, and social deficits<sup>1</sup>. SCZ is estimated to impact over 24 million  
53 individuals worldwide, with particularly high prevalence, incidence, and burden in the United States<sup>2</sup>. In  
54 addition to the mental, social, occupational, and educational duress associated with SCZ, affected  
55 individuals have a reduced life expectancy by about 12-15 years relative to the general population<sup>3-5</sup>.

56 While the genetic contribution to SCZ risk is high, with a heritability of 64%-80%<sup>6-8</sup>, patients  
57 exhibit variable phenotypes and complex inheritance patterns. This is indicative of an environmental  
58 contribution to disease risk mediated by gene-by-environment interactions<sup>7,9</sup>. Current treatment  
59 strategies for SCZ include the administration of antipsychotic drugs. However, many clinical trials for  
60 antipsychotics have failed or yielded negative-to-moderate effects in SCZ patients, who exhibit variable  
61 responses to treatment depending on age of onset, sex, geographic location, and other factors<sup>10</sup>. This  
62 clinical heterogeneity is thought to reflect the contribution of varying underlying biological processes  
63 among patients<sup>11</sup>. Therefore, in order to develop more effective or targeted therapeutics, it is imperative  
64 that we understand the genetic architecture of this disorder.

65 In recent years, collaborative large genome wide association studies (GWAS) have robustly  
66 identified 287 independent loci contributing to the risk for SCZ<sup>12</sup>. While these discoveries are valuable, one  
67 of the primary limitations of a GWAS is that it cannot resolve the lead single nucleotide variant (SNV)  
68 driving the risk association, from other variants in linkage disequilibrium (LD). It is also increasingly  
69 acknowledged that most variants identified by GWAS are located in non-coding regions of the genome,  
70 and ~40% of the time, the haplotype blocks that contain these lead SNVs do not include coding exons<sup>13-</sup>  
71 <sup>15</sup>. In fact, a growing body of evidence, including expression Quantitative Trait Loci (eQTL) studies, suggest  
72 that most variants in LD with lead GWAS SNVs are regulatory in nature<sup>15-19</sup> and concentrate in regulatory

73 DNA marked by deoxyribonuclease I (DNase I) hypersensitive sites (DHSs)<sup>20</sup>. Nevertheless, even when  
74 variants are eQTLs for specific genes, it is often not just one gene that they regulate, and the LD conundrum  
75 remains. As a result, genes are often implicated because of their proximity to SCZ-associated variants and  
76 known involvement in synaptic biology but are seldom accompanied by direct functional evidence.

77 While identifying reliable genetic associations is a significant first step towards understanding the  
78 etiology of SCZ, functional studies linking specific variants to the regulation of specific genes and biological  
79 processes is an important next step towards unlocking their translational potential. Understanding how  
80 SCZ associated variants are involved in regulatory activities will promote the generation of innovative  
81 disease treatments and prophylactics. Technological advancements in cell engineering and genome editing  
82 using CRISPR/Cas9<sup>21</sup> – and the ability to generate human induced pluripotent stem cells (hiPSCs) that can  
83 be differentiated to a variety of cell types – have created a new toolkit for modeling human diseases<sup>22</sup>.  
84 Neurons that carry variants implicated in disease risk can now be generated and compared to neurons  
85 that carry non-risk alleles at the same position, on an otherwise isogenic background. This strategy can be  
86 used to not only show the functionality of non-coding, potentially regulatory variants, but also to observe  
87 its consequences in a disease-relevant context. One of the most informative ways to characterize and  
88 phenotype such allelic differences is to study the transcriptome, in which allele-specific effects may be  
89 identified that impact the target gene, but also point to disrupted transcriptional programs and their  
90 pathways.

91 We employ this strategy in the work we present here, where we test the functionality of one such  
92 non-coding, SCZ-associated, SNV based on the strength of its association to SCZ and the presence of open  
93 chromatin marks in a disease-relevant, neuronal population. We first employ a well-established transgenic  
94 zebrafish reporter assay<sup>23–25</sup> to confirm the regulatory potential of the sequence within which this variant  
95 resides. We then use precise genome editing to generate isogenic hiPSC-derived neural precursor cells  
96 (NPCs) that possess the risk allele and non-risk allele and compare the transcriptional differences between

97 NPCs with the SCZ risk allele versus the non-risk allele. Our results support the functionality of this SCZ risk  
98 variant, identify transcriptional changes associated with possession of this variant, and unearth additional  
99 downstream effects within SCZ-related pathways in the transcriptome.

100

## 101 2. MATERIAL AND METHODS

### 102 2.1. Variant Prioritization

103 We prioritized characterization of variant rs4129585 based on the information available at  
104 initiation of the project. The second version of SCZ GWAS data was available at the time from the SCZ  
105 working group of the psychiatric genetics consortium (PGC) ([https://pgc.unc.edu/for-](https://pgc.unc.edu/researchers/working-groups/schizophrenia-working-group/)  
106 [researchers/working-groups/schizophrenia-working-group/](https://pgc.unc.edu/researchers/working-groups/schizophrenia-working-group/))<sup>26</sup>, which indicated that rs4129585 was the  
107 top-ranking SNV at that locus near the *TSNARE1* and *ADGRB1* genes ( $p= 2.03 \times 10^{-13}$ , risk allele = C). This  
108 variant was reported by the PICS fine-mapping algorithm ([pics2.ucsf.edu](https://pics2.ucsf.edu)) to be the most likely driver of  
109 SCZ association at that locus. Using the UCSC genome browser, we found that rs4129585 overlaps with a  
110 chromatin immunoprecipitation signal from restrictive element-1 silencing transcription factor / neuron-  
111 restrictive silencing factor (REST/NRSF) and was shown to drive reporter gene expression in K562 cells  
112 ( $p=2.4 \times 10^{-4}$ ) in a massively parallel reporter assay (MPRA) we recently reported<sup>27</sup>. Of note, another nearby  
113 SNV, rs13262595, is in very high LD with rs4129585 (LD,  $r^2=0.996$  from <https://ldlink.nih.gov/>), which was  
114 also strongly associated with SCZ risk. At the time, this SNV showed slightly weaker association ( $p= 2.85 \times 10^{-$   
115  $13$ , risk allele = G); however, in most recent PGC data<sup>12</sup>, rs13262595 had slightly stronger signal ( $p=$   
116  $5.109 \times 10^{-18}$ ) compared to rs4129585 ( $p= 7.062 \times 10^{-18}$ ). It also overlaps with many chromatin marks, making  
117 it another good candidate to drive SCZ risk at this locus. This SNV was not found to drive reporter gene  
118 expression in our published MPRA<sup>27</sup>. Nevertheless, rs13262595 remains a target of our future  
119 investigations.

120

## 121 2.2. Functional Assessment using Zebrafish Transgenesis

122 To evaluate the regulatory potential of rs4129585 and its surrounding sequence, we employed  
123 Tol2 transposon-mediated transgenesis according to our standard protocol<sup>23–25</sup>, with minor modifications.  
124 Briefly, primers were designed to amplify a human non-coding sequence containing rs4129585 (**Table S1**).  
125 The boundaries of this sequence (hg38 chr8:142231443-142231752) were chosen to include a ChIP-seq  
126 peak surrounding rs4129585, as identified by the UCSC Genome Browser hg38 track “Transcription Factor  
127 ChIP-seq Clusters (340 factors, 129 cell types) from ENCODE 3,” suggestive of restrictive element-1  
128 silencing transcription factor (REST)/neuron-restrictive silencing factor (NRSF) transcription factor (TF)  
129 occupancy.

130 Next, we ligated 5' *attB* sequences to each primer set and amplified our chosen sequence by PCR.  
131 Instead of gel extraction, leftover PCR product was purified using the DNA Clean & Concentrator™-5 kit  
132 (Zymo Research #D4067). The *attB* PCR product was cloned into an empty pDONR™221 vector, and the  
133 resulting construct underwent recombination with a pGW\_*cfos*EGFP destination vector, such that the  
134 conserved non-coding sequence was placed upstream of a *cfos* minimal promoter that drives EGFP  
135 expression and flanked by Tol2 transposons that promote efficient genomic integration of the reporter  
136 construct. Purified recombinant DNA was injected into 1–2-cell zebrafish embryos, as previously  
137 described<sup>23</sup>. Injections were performed in zebrafish embryos of the strain AB, which were obtained from  
138 the Zebrafish International Resource Center (<http://zfin.org>; ZFIN ID: ZDB-GENO-960809-7) and raised in  
139 our facility. Embryos were screened for EGFP expression at 4- and 6-days post fertilization (d.p.f.) using a  
140 Nikon AZ100 Multizoom fluorescence microscope, and the embryos with the strongest EGFP signal were  
141 selected to be raised to sexual maturity.

142 After 3 months, ≥5 sexually mature adults were crossed with wild-type AB fish and F<sub>1</sub> embryos  
143 were screened for EGFP to confirm germline transmission of the transposon-mediated insertion, again  
144 using a Nikon AZ100 Multizoom fluorescence microscope at 6 d.p.f. To ensure that position effects of

145 individual transgene insertions did not confound our results<sup>23</sup>, F<sub>1</sub> embryos were screened from each of 5  
146 independent parental clutches, and  $\geq 3$  representative F<sub>1</sub> founder fish with consistent EGFP expression  
147 were selected from each clutch and raised to sexual maturity. At 3 months of age, F<sub>1</sub> founders were again  
148 crossed with wild-type AB fish. The resulting F<sub>2</sub> embryos were collected and raised in embryo media (E3)  
149 that contained 200  $\mu$ M 1-phenyl 2-thiourea (PTU; Sigma Aldrich #P7629) to inhibit pigmentation<sup>28</sup>. This  
150 E3/PTU media was replaced daily.

151 At 6.d.p.f., ethyl-3-aminobenzoate methanesulfonate salt (Tricaine/MS-222; Sigma Aldrich  
152 #E10521) was prepared at a concentration of 4 mg/mL, buffered to pH7 using 1M Tris (pH 9; 4% v/v), and  
153 added to E3 medium to anaesthetize zebrafish larvae during the imaging process. Imaging was performed  
154 using the GFP filter and auto exposure settings on a Nikon AZ100 Multizoom fluorescence microscope, and  
155 GFP expression patterns among founder zebrafish were analyzed (**Table S2**), after which zebrafish larvae  
156 were transferred to a new dish containing fresh E3 media.

157

### 158 2.3. Cell line used for CRISPR editing and cell culture.

159 The iPSC line MH0180966 used for CRISPR/Cas9 editing and further experiments was derived from  
160 a female individual of European descent without a psychiatric diagnosis and provided to us by the stem  
161 cell repository at Rutgers University (NIMH/RUCDR). We received the line at passage number 12. The iPSC  
162 line was treated as we have outlined previously<sup>21,29</sup>. Briefly, the cells were grown on culture plates coated  
163 with 5 $\mu$ g/mL laminin (ThermoFisher BioLamina #LN521) and incubated in a humidified 5% CO<sub>2</sub> incubator  
164 at 37°C for  $\geq 2$  hours. Once seeded, the cells were maintained in StemFlex media with supplement  
165 (ThermoFisher Gibco #A3349401) and 1% penicillin–streptomycin (Penn/Strep; Gibco # 15140122) in a  
166 humidified 5% CO<sub>2</sub> incubator at 37°C. When thawing, passaging, or transfecting, 10 $\mu$ M Y-27632 Rho-kinase  
167 inhibitor (ROCKi; Tocris #1254) was added to culture media. Cells at 70-80% confluence were passaged  
168 using 1X Phosphate-buffered saline (PBS) and accutase (MilliporeSigma #A6964) every ~4-5 days. Cell

169 stocks were first frozen at -80°C in StemFlex media with 10% Dimethylsulfoxide (DMSO) for 24h before  
170 storage in liquid nitrogen. iPSC genotyping was done by PCR and Sanger sequencing using primers listed  
171 in the Supplementary Information file of Feuer & Wabeh, 2022 (see Online Methods; *TSNARE1*  
172 experiment)<sup>21</sup>.

173

#### 174 2.4. Generating Allele-Specific iPSC Lines

175 To induce target sequence deletion and subsequent re-insertion of the rs4129585 non-risk (A) and  
176 risk (C) alleles, we employed our pipeline for scarless genome editing, CRISPR Del/Rei<sup>21</sup>. Detailed methods,  
177 transfection and selection details, and summary of off-target analyses; as well as sequences for primers,  
178 single guide RNAs (sgRNAs), and single stranded oligodeoxynucleotide (ssODN), can be found in the  
179 Supplementary Information file of Feuer & Wahbeh *et al.*, 2022 (see Online Methods; *TSNARE1*  
180 experiment)<sup>21</sup>. In brief, sgRNA oligos were designed using CRISPOR (<http://crispor.tefor.net/crispor.py>) to  
181 flank rs4129585 and induce a deletion between GRCh37/hg19 chr8:142231553-142231597. Restriction  
182 enzyme BbsI sticky ends were added to single-stranded DNA oligos before the oligos were annealed and  
183 cloned in pairs into pDG459 plasmids containing a puromycin resistance gene. pDG459 plasmids were  
184 transfected into iPSCs using lipofectamine-stem and successful transfection was selected for using  
185 puromycin<sup>21</sup>. Cells were screened for desired edits and candidate off-target effects<sup>21</sup> at 4 genomic locations  
186 that showed 3 or fewer mismatches with the gRNAs and were in coding sequences or overlapped with  
187 DNase hypersensitivity sites from the encode project ([www.encodeproject.org](http://www.encodeproject.org); file  
188 hg38\_wgEncodeRegDnaseClustered.txt). Single cell clones with the appropriate deletion and no off-target  
189 events were chosen for expansion. Next, a synthetic sgRNA (syn-sgRNA) and an ssODN repair template  
190 were designed to reinsert either the non-risk allele or risk allele at the appropriate genomic position. As  
191 with the deletion step, syn-sgRNAs were cloned into a pX459 plasmid with a puromycin resistance gene,  
192 transfected into iPSCs, and edited cells were selected for using puromycin, before iPSCs were again



193 screened for appropriate reinsertion and lack of off target effects at 8 candidate genomic locations, as  
194 above <sup>21</sup>.

195

## 196 2.5 Differentiation into Neural Precursor Cells

197 Each iPSC clone was differentiated into Neural Progenitor Cells (NPCs) through directed  
198 differentiation of embryoid bodies<sup>30</sup> (EB) with SMAD, as previously described<sup>31,32</sup> with minor modifications.  
199 In brief, iPSCs were first plated at a density of ~300 k/well in 3 wells of 6-well laminin-coated plate.  
200 Differentiation was initiated 2 days later by passaging cells at a density of 5K cells/well in a round-bottom,  
201 untreated 96-well plate (Corning #3788) in 50ul/well of MTeSR media (Thermo #85850) and Rocki (Y-27632  
202 dihydrochloride; BD Biosciences # 562822). Directly after plating, the plate was spun at 1,000 RPM for 3-4  
203 minutes to condense the cells and facilitate EB formation. The following day, (DIV0) the presence of EBs  
204 were confirmed and 50uL of Neural Induction Media (NIM) was added to each well, composed of  
205 DMEM/F12 Media (Thermo #11320033) with 2% B27 supplement without vitamin A (Thermo #12587010),  
206 1% GlutaMAX (Thermo # 35050061), 1% N2 (Thermo #17502048), 1% MEM NEAA (Non-Essential Amino  
207 Acids; Thermo #11140050), and 1:100 BME (Beta-mercaptoethanol; Thermo #21985023) with freshly  
208 added SMAD Inhibitors SB431542 (Reprocell #NC1388573) at 20uM and LDN193189 (Peprotech #1062443  
209 -1mg) at 200nM. From DIV1-DIV3, 50ul of NIM was added to each well with half the concentration SMAD  
210 Inhibitors as day 1 (SB431542 at 10uM, LDN193189 at 100nM) until reaching 200ul/well.

211 From DIV4 onwards, 100ul of NIM with SMAD Inhibitors was exchanged daily until EB maturity  
212 (DIV6 - DIV9). EBs were passaged into 3 wells of a 6-well plate that was coated in 1:100 matrigel (Corning  
213 # 47743-720) for 1 hour at 37°C and contained 2ml of NIM/well with SMAD Inhibitors. EBs were then  
214 carefully removed from the 96- well plate into 1-2 wells of an uncoated 6-well plate with warm DMEM/F12,  
215 before being transferred to the coated plate containing NIM. The EBs adhered to the Matrigel and were  
216 fed daily from DIV7-DIV13 with NIM, SMAD inhibitors, and 10ng/mL FGF2 (Miltenyi #130-093-838) until

217 robust rosettes formed. Once formed, rosettes were manually picked and transferred into 3 wells of a 6-  
218 well plate coated in 1:100 matrigel for 1 hour at 37°C and containing 2ml of NIM/well with SMAD  
219 inhibitors. The following day onwards, cells were fed with NIM, SMAD inhibitors, and FGF2 until robust  
220 rosettes formed again. The rosettes were again lifted manually, and Accutase was added to separate the  
221 cells before they were plated into NPC media containing half DMEM/F12 and half Neurobasal Media  
222 (Thermo #21103049) with 2% B27 supplement without vitamin A, 1% GlutaMAX, 1% N2, 1% MEM NEAA  
223 and 1:100 BME. FGF2, 10ng/ml EGF (Peprotech #100-47-10ug) and Rocki were also added. Cells at this  
224 stage were fed with this NPC media without Rocki every 2 days until ~70% confluent. After 2 passages, the  
225 cells were characterized by the presence of NPC markers.

226

## 227 2.6 Characterization of NPCs

228 To confirm the identity and quality of NPCs, we visualized the expression of NPC markers and lack  
229 of expression of iPSC markers by immunocytochemistry staining. 3-4 days before staining, a 4-well  
230 chamber slide (Thermo #62407-294) was coated with 1:100 matrigel in DMEM/F12 for 1 hour (300uL per  
231 well) and ~150k NPCs were plated into each well. Slides were fed once every 2 days with NPC media until  
232 the cells were ~60% confluent. NPC media was then removed, and the cells were washed with cold 1XPBS  
233 and fixed using 4% PFA (Alfa Aesar #J61899). Cells were blocked for 1 hour using a blocking buffer  
234 composed of 1XPBS, 5% Goat Serum, and 0.3% Triton X-100 (Sigma #93443-100mL), after being washed  
235 three times with 1X PBS for 5 minutes each time. Following blocking, cells were incubated in antibody  
236 solution made up of 1XPBS, 1% BSA, and 0.3% Triton X-100, as well as different combinations of 1:200  
237 Nestin antibody, 1:200 PAX6 antibody, 1:300 TRA-160 antibody, 1:300 SOX2 antibody, and 1:200 Nanog  
238 antibody at 4°C overnight. Slides were washed three times with cold 1X PBS for 5 minutes each time before  
239 adding antibody solution with 1:400 488 Goat  $\alpha$ -Mouse secondary antibody and 1:400 565 Goat  $\alpha$ -Rabbit  
240 secondary antibody. Incubation lasted 1h at 37°C before washing three times with cold 1X PBS again before

241 mounting with 25uL of the prolong mounting media with DAPI (Invitrogen #P36931) to each well. Slides  
242 were imaged with an Axio Observer fluorescent microscope. Next, we performed RT-qPCR in some of the  
243 samples by generating cDNA from 1ug of RNA from each clone before and after differentiation (iPSCs and  
244 NPCs) using the Superscript III kit, following the manufacturer's protocol (ThermoFisher # 18080400).  
245 cDNA was diluted 1:10 in water for RT-qPCR. We used iTaq and custom primers (**Table S3**) following the  
246 manufacturer's protocol (BioRad # 1725120). We used the CFX Connect System with denaturation at 95°C  
247 for 20 sec, amplification for 40 cycles, Denaturation at 95°C for 1 sec, annealing at 60°C for 30, and Melt  
248 Curve Analysis at 65-95°C. Normalized relative quantification and error propagation was calculated and  
249 analyzed as proposed by Taylor *et al.* (2019)<sup>33</sup>, with results normalized to *ACTB* and *GAPHD*. A two-sample  
250 t-test was performed using R function "t.test", (alternative = "two.sided") to test for significant differences  
251 in gene expression.

252

## 253 2.6. RNA-sequencing

254 Total RNA was isolated from 1 confluent well of NPCs/line from a 6 well plate using the Zymo  
255 Quick-RNA™ Miniprep Kit (#R1054) following the manufacturer's protocol. RNA was submitted to  
256 Novogene (novogene.com) for 150-bp paired-end RNA-sequencing. All libraries passed Novogene's post-  
257 sequencing quality control, except REF\_5, which was excluded from analysis. We received an average of  
258 51.1 million reads per sample with a maximum of 74.9 and a minimum of 42.5 million reads. Reads were  
259 aligned to the human reference genome GRCh38 using Hisat2 version 2.1.0<sup>34</sup> and corresponding BAM files  
260 were generated using Samtools 1.9<sup>35</sup>. Stringtie 2.0.3<sup>36</sup> was used to assemble and estimate the abundance  
261 of transcripts based on GRCh38 human gene annotations<sup>37</sup>. Bioconductor package tximport was used to  
262 compute raw counts by reversing the coverage formula used by Stringtie with the input of read length<sup>36</sup>.  
263 The output was then imported to the Bioconductor package, DESeq2, for differential gene expression  
264 analysis<sup>38</sup>. Benjamini-Hochberg adjustment<sup>39</sup> was used to calculate adjusted p-values (padj). Before

265 expression analysis, principal component (PC) analysis (**Figure S6; Figure S7**) was performed on the  
266 adjusted read counts and the first PC was included in further analysis as a covariate.

267

## 268 2.7 Bioinformatics Analysis

269 To explore which genes were differentially expressed (DE) between edited and unedited iPSC-  
270 derived neurons (rs4129585 non-risk and risk alleles), we used the Panther bioinformatics platform<sup>40</sup>  
271 (<https://www.pantherdb.org/>), which reports enrichments across the Gene ontology (GO) resource terms  
272 (<https://geneontology.org/>) corrected for multiple testing. We used all genes with detectable transcripts  
273 in our dataset as a background. To look for interactions between the DE genes, we used the STRING  
274 database<sup>41,42</sup> ([string-db.org](http://string-db.org)). As suggested by the curators of the STRING database website, we used the  
275 medium-level confidence score (0.4) for interactions and did not include any additional level of interactors,  
276 to ensure the validity of the observed network enrichment p-values. In addition to enrichment for  
277 interactions, STRING reports significant functional enrichments, similar to Panther but tested only among  
278 interacting DE genes, thus pointing to the function of the identified network.

279

## 280 3. RESULTS

281 *3.1. A transcription factor binding site containing rs4129585 drives reporter gene expression in transgenic*  
282 *zebrafish neuroanatomy.*

283 To test rs4129585 and the surrounding sequence for regulatory function, we utilized a transgenic  
284 zebrafish reporter assay in which the presence of an upstream regulatory element is required for a minimal  
285 promoter to induce GFP reporter gene expression. The SCZ-associated variant rs4129585 lies within a ChIP-  
286 seq REST/NRSF TF binding site (TFBS), and the entire sequence representing the ChIP-seq peak was  
287 integrated into the zebrafish genome upstream from a *cfos* minimal promoter/GFP reporter construct.  
288 REST is an epigenetic remodeler that is widely expressed during human embryogenesis and late-stage

289 neuronal differentiation. REST acts as a transcriptional repressor of neural-specific genes involved in  
290 synaptogenesis, axonal pathfinding, synaptic plasticity, and structural remodeling in humans<sup>43,44</sup>;  
291 therefore, it is unsurprising that this sequence drives GFP expression in the zebrafish brain (**Figure 1**).

292 Representative GFP expression pattern from F<sub>2</sub> zebrafish embryos suggest that this sequence is  
293 functional in three major neuroanatomical regions (**Figure 1 & Figure S1**): (1) the habenula, which is  
294 involved in aversive social responses in zebrafish<sup>45</sup>, including anxiety<sup>46</sup>, fear<sup>47</sup>, and aggression<sup>48</sup>; (2) the  
295 caudal hypothalamus, which is involved in appetite control<sup>49</sup>, but in which dopaminergic (DA) neurons are  
296 also involved in audio-sensory functions, including locomotion and sensation of acoustic/vibrational  
297 stimuli<sup>50</sup>; and (3) the inferior olive, which receives DA projections from the caudal hypothalamus<sup>50</sup>, but  
298 also provides climbing fibres to Purkinje cells of the cerebellar cortex that are required for motor  
299 learning<sup>51,52</sup>. The more widespread GFP signal in these fish is consistent with expression in glutamatergic  
300 neurons, as well as a few regions with GABAergic neurons (**Figure 1**). These findings suggest that the SCZ-  
301 associated variant, rs4129585, likely lies within a TFBS that elicits its regulatory function in glutamatergic  
302 neurons and regions of the brain that have been implicated in neurodevelopment and SCZ pathology<sup>53-62</sup>.

303

### 304 *3.2. iPSC-derived NPCs exhibit transcriptomic changes associated with a SCZ risk allele.*

305 With evidence that rs4129585 lies within a functional regulatory element implicated in  
306 neurobiology, we obtained human-derived iPSCs, used CRISPR-mediated genome editing to engineer the  
307 rs4129585 risk and non-risk alleles into otherwise isogenic cell lines, and differentiated these lines into  
308 NPCs. NPCs were selected as the differentiation endpoint because they are at an early stage in neuronal  
309 differentiation, and SCZ is considered a neurodevelopmental disorder<sup>59,60,63,64</sup>. Immunostaining and RT-  
310 qPCR with NPC- and iPSC-specific markers showed the former to be upregulated and the later  
311 downregulated (**Figure S2, Figure S3, Figure S4, Figure S5**); thus, confirming successful differentiation from  
312 iPSCs to NPCs. We then performed RNA-seq to identify the transcriptional changes elicited by the altered

313 variants. PC analysis of the RNAseq data identified one reference clone (REF\_6) to be an outlier across PC1  
314 (**Figure S6**). NPC and iPSC marker gene expression (**Table S4**) suggest that this cell line might not be as far  
315 along in the differentiation process. To correct for this difference going forward, we used PC1 as a covariate  
316 in the analysis. Differential expression analysis revealed differences in the expression of 109 genes at FDR  
317 <0.05 and 259 genes at FDR <0.1. Of these, 116 were upregulated and 143 were downregulated (**Table S5**  
318 shows the complete results at the gene level, while **Table S6** shows the results at the transcript level). We  
319 then proceeded to test these genes for functional enrichments using the Panther Bioinformatics  
320 database<sup>40</sup>, using the FDR <0.1 threshold to obtain higher statistical power. This revealed strong  
321 enrichments in many functional categories with direct relevance to schizophrenia, such as neuron  
322 development, differentiation, axonogenesis, and axon guidance, among many others (**Figure 2**).

323 We next used the STRING database of protein-protein interactions<sup>41,42</sup> to test whether the protein  
324 products of the dysregulated genes are functionally related as evidenced by reported interactions between  
325 them, an indication of validity of the results which also allowed further functional exploration. This analysis  
326 showed that these genes are highly interconnected (STRING enrichment- $p=1.2 \times 10^{-11}$ ) with 1.66-fold more  
327 interconnections than expected by chance for the same number of proteins. Further, functional  
328 enrichment analysis for the network proteins as performed by STRING showed many of the same  
329 enrichments observed with Panther Bioinformatics, now including synapse organization and assembly,  
330 (FDR<0.02), central nervous system development, regulation of synapse assembly and axon guidance.  
331 **Figure 3** shows all enrichments and **Figure 4** shows as an example the 11 axon guidance genes in the  
332 STRING network, representing a more than 4-fold enrichment from the expected.

333 Results from the Genotype-Tissue Expression (GTEx) project ([www.gtexportal.org/home/](http://www.gtexportal.org/home/)) show  
334 that rs4129585 is an eQTL for its' two nearest genes, *TSNARE1* and *ADGRB1*, regulating both the genes  
335 and specific transcripts' abundances in a variety of tissues and at varying directions (including cerebellum  
336 but not brain). We looked at our results for the effects of the variant on these two genes and found no

337 effect on *TSNARE1* and a suggestive effect on *ADGRB1* ( $p=0.06$ ), with the risk allele increasing expression  
338 in our induced NPCs. Interestingly, *ADGRB1*, is a regulator of synaptogenesis<sup>65</sup>. None of the transcripts of  
339 *TSNARE1* (9 present in our data) showed significant differences. Of the 5 *ADGRB1* transcripts in our data,  
340 two showed significant differences (ENST00000517894, nominal  $p=0.005$  and ENST00000518812, nominal  
341  $p=0.03$ ), both of which were upregulated with the risk allele. Note that ENST00000518812 is not a protein  
342 coding transcript.

343

#### 344 4. DISCUSSION

345 In the last decade, GWASs have successfully identified relatively common genetic variants that  
346 drive disease associations, which has inspired a new chapter in genetic disease research that aims to  
347 identify the biological mechanisms through which genetic variation influences disease risk. Cellular  
348 modeling is quickly becoming a powerful tool for the study of genetic risk variants, particularly those  
349 within non-coding regions of the genome, as technological advances are being made in genome editing,  
350 iPSC generation from somatic cells, and directed differentiation methods<sup>22</sup>. Now, we are able to generate,  
351 study, and compare human neuronal cells with only a single nucleotide difference across the entire  
352 genome, as we and others have previously reported<sup>21,29,66–70</sup>. This approach provides the opportunity to  
353 elucidate the individual contributions of risk variants in a human- and disease-relevant system. Here, we  
354 apply this strategy to study a GWAS-identified, non-coding variant implicated in SCZ risk, rs4129585.

355 We first tested the regulatory potential of this variant in zebrafish and found that it drives reporter  
356 gene expression exclusively in the brain, and in regions relevant to SCZ, including areas involved in fear,  
357 anxiety, audio-sensory functions, and sensory-motor functions. Further, according to ENCODE data, this  
358 non-coding variant lies within a REST binding site, a TF already implicated in SCZ<sup>44</sup>. We next introduced the  
359 risk and non-risk alleles into iPSCs, differentiated them into biologically relevant NPCs, and produced  
360 clones homozygous for each allele on otherwise identical genomic backgrounds. Comparing the risk and

361 reference alleles, we observed changes in the abundance of an alternatively spliced nearby gene, *ADGRB1*,  
362 as well as transcriptome changes affecting genes involved in axon guidance, synaptogenesis, and other  
363 functional pathways. The identified DE genes encode proteins that interact with each other more than  
364 would be expected by chance; further validating our results and supporting the observed functional  
365 enrichments.

366 Although we are not the first group to link synaptogenesis, axon guidance, and neuronal  
367 development with SCZ, we do so here for a specific SCZ risk variant, which we implicate as a regulator of  
368 a specific gene, *ADGRB1*, an adhesion G protein-coupled receptor<sup>71</sup>. Consistent with our transcriptomic  
369 observations, *ADGRB1* has been linked to brain development and developmental disorders<sup>72,73</sup>, dendritic  
370 arborization<sup>74</sup>, synapse development and synaptic plasticity<sup>65,75,76</sup>. As such, it is not surprising to find  
371 suggestive evidence that it drives the risk in genetic associations with SCZ. The neighboring *TSNARE1* is  
372 also a strong candidate for SCZ risk, and it was originally reported as the driver of the association due to  
373 the localization of the lead variants within the gene<sup>77</sup> in addition to its role in regulating endosomal  
374 trafficking in cortical neurons<sup>78</sup>.

375 The SNV rs4129585 has been previously identified as influencing the expression of nearby genes;  
376 in fact, GTEx shows that this variant is an eQTL for both *TSNARE1* and *ADGRB1*. However, since GTEx data  
377 is purely statistical – not functional – and comes from multiple tissues with bulk cells containing a variety  
378 of cell types, it only reflects the cumulative effects of all variants in LD at the locus where rs4129585  
379 resides. There is no reason to assume that rs4129585 is the only functional variant at this locus, especially  
380 since there are other variants in LD with functional potential, such as rs13262595, as discussed in our  
381 methods. Our data shows that *ADGRB1* transcription is influenced by rs4129585 and by the sets of DE  
382 genes across the transcriptome, supporting the involvement of *ADGRB1* rather than *TSNARE1*, it remains  
383 possible that *TSNARE1* is also involved, but is regulated by another SNV in LD, such as rs13262595. Study  
384 of all such variants individually will shed additional light onto how these alleles and corresponding



385 haplotypes influence SCZ risk and will provide valuable insights for the study of GWAS-identified variation,  
386 where the identification of multiple variants in strong LD is the rule, rather than the exception. Such future  
387 studies will eventually solve the puzzle of the complex interplay between multiple variants that can  
388 influence disease risk.

389 Our work suggests that, despite having a small effect on risk, a common variant can have a  
390 measurable effect on the transcriptome of NPCs, which points to specific functional pathways that, in turn,  
391 indicate disease mechanisms. There are three main reasons why this could be the case. First, studying risk  
392 and non-risk alleles in homozygosity, in otherwise isogenic cells, and under well-controlled conditions in  
393 vitro, may reduce noise and increase power to detect even small effects. Second, the study of cells in vitro  
394 not only reduces noise, but may also avoid a feedback buffering mechanism that acts at the organism level  
395 to dampen the effect of the variant<sup>79</sup>. Finally, studying an allele in isolation from other potentially  
396 functional alleles in LD might allow for the observation of effects that would otherwise be counteracted  
397 by the other alleles on the same haplotype. Natural selection could be making such a phenomenon more  
398 frequent than we recognize, if deleterious haplotypes are being selected against. This is particularly likely  
399 in SCZ, where negative selection appears to be strong<sup>80-83</sup>.

400 While studying NPC cultures in isolation has advantages, this isolation is also a limitation, since  
401 only cell-autonomous effects can be revealed. To bypass this limitation, 3D cerebral organoid culture  
402 systems could be leveraged, and accompanied by single cell sequencing. Despite being a more time  
403 consuming and expensive approach, it would be a valuable addition to monocellular cultures. While we do  
404 not currently have such results in organoid-based cultures or involving other GWAS-identified risk variants,  
405 we consider this, along with the study of multiple variants per locus, as an important addition to future  
406 projects.

407

408 AUTHOR CONTRIBUTIONS: D.A. conceptualized the study design. R.J.B. designed and performed  
409 transgenic zebrafish reporter assays. M.H.W., C.Y., and B.R. performed cell culturing. M.H.W. performed  
410 genome editing of iPSCs, differentiation, and validation of NPCs. R.J.B. analyzed RT-qPCR data. D.A.  
411 performed bioinformatics analyses with contributions by R.J.B. R.J.B, D.A., and M.H.W. wrote the paper.  
412 M.H.W, R.J.B., C.Y., A.S.M., and D.A. contributed to the scientific discussion, data interpretation, and paper  
413 revision. All authors have read and agreed to the published version of the manuscript.

414

415 FUNDING: This research was supported in part by awards from the National Institutes of Health  
416 (R01MH113215 and R21MH122936) to D.A., (R01HG010480 and R21NS128604) to A.S.M., and  
417 (T32GM007814-40) to R.J.B.; and by the Canadian Institutes of Health Research (DFD-181599) to R.J.B.

418

419 DATA AVAILABILITY: RNA-sequencing data will be available at the Gene Expression Omnibus (GEO) upon  
420 article acceptance.

421

422 ACKNOWLEDGEMENTS: The authors would like to acknowledge Anna Vakhnovetsky and Akul  
423 Umamageswaran for their technical support, as well as the FlnZ Zebrafish Core Center for assistance with  
424 zebrafish husbandry.

425

426 CONFLICTS OF INTEREST: The authors declare no competing interests.

427 REFERENCES

- 428 1. Rahman, T. & Lauriello, J. Schizophrenia: An Overview. *Focus J. Life Long Learn. Psychiatry* **14**, 300  
429 (2016).
- 430 2. Solmi, M. *et al.* Incidence, prevalence, and global burden of schizophrenia - data, with critical  
431 appraisal, from the Global Burden of Disease (GBD) 2019. *Mol. Psychiatry* **2023** **6**, 1–9 (2023).
- 432 3. Crump, C., Winkleby, M. A., Sundquist, K. & Sundquist, J. Comorbidities and mortality in persons  
433 with schizophrenia: a Swedish national cohort study. *Am. J. Psychiatry* **170**, 324–333 (2013).
- 434 4. Hjorthøj, C., Stürup, A. E., McGrath, J. J. & Nordentoft, M. Years of potential life lost and life  
435 expectancy in schizophrenia: a systematic review and meta-analysis. *The Lancet Psychiatry* **4**,  
436 295–301 (2017).
- 437 5. Lawrence, D., Hancock, K. J. & Kisely, S. The gap in life expectancy from preventable physical  
438 illness in psychiatric patients in Western Australia: retrospective analysis of population based  
439 registers. *BMJ* **346**, (2013).
- 440 6. Lichtenstein, P. *et al.* Common genetic determinants of schizophrenia and bipolar disorder in  
441 Swedish families: a population-based study. *Lancet* **373**, 234–239 (2009).
- 442 7. Wahbeh, M. H. & Avramopoulos, D. Gene-Environment Interactions in Schizophrenia: A  
443 Literature Review. *Genes* **2021**, Vol. 12, Page 1850 **12**, 1850 (2021).
- 444 8. Stilo, S. A. & Murray, R. M. Non-Genetic Factors in Schizophrenia. *Curr. Psychiatry Rep.* **21**,  
445 (2019).
- 446 9. Tsuang, M. T., Gilbertson, M. W. & Faraone, S. V. The genetics of schizophrenia. Current  
447 knowledge and future directions. *Schizophr. Res.* **4**, 157–171 (1991).
- 448 10. Rabinowitz, J. *et al.* Determinants of antipsychotic response in schizophrenia: implications for  
449 practice and future clinical trials. *J. Clin. Psychiatry* **75**, (2014).
- 450 11. Tsuang, M. T. & Faraone, S. V. The case for heterogeneity in the etiology of schizophrenia.

- 451            *Schizophr. Res.* **17**, 161–175 (1995).
- 452    12.    Trubetskoy, V. *et al.* Mapping genomic loci implicates genes and synaptic biology in  
453            schizophrenia. *Nature* **604**, 502–508 (2022).
- 454    13.    Manolio, T. A. *et al.* Finding the missing heritability of complex diseases. *Nature* **461**, 747–753  
455            (2009).
- 456    14.    Visel, A., Rubin, E. M. & Pennacchio, L. A. Genomic views of distant-acting enhancers. *Nature* **461**,  
457            199–205 (2009).
- 458    15.    Hindorff, L. A. *et al.* Potential etiologic and functional implications of genome-wide association  
459            loci for human diseases and traits. *Proc. Natl. Acad. Sci. USA* **106**, 9362–9367 (2009).
- 460    16.    Schaub, M. A., Boyle, A. P., Kundaje, A., Batzoglou, S. & Snyder, M. Linking disease associations  
461            with regulatory information in the human genome. *Genome Res.* **22**, 1748–1759 (2012).
- 462    17.    Majewski, J. & Pastinen, T. The study of eQTL variations by RNA-seq: from SNPs to phenotypes.  
463            *Trends Genet.* **27**, 72–79 (2011).
- 464    18.    Gilad, Y., Rifkin, S. A. & Pritchard, J. K. Revealing the architecture of gene regulation: the promise  
465            of eQTL studies. *Trends Genet.* **24**, 408–415 (2008).
- 466    19.    Cookson, W., Liang, L., Abecasis, G., Moffatt, M. & Lathrop, M. Mapping complex disease traits  
467            with global gene expression. *Nat. Rev. Genet.* **10**, 184–194 (2009).
- 468    20.    Maurano, M. T. *et al.* Systematic localization of common disease-associated variation in  
469            regulatory DNA. *Science* **337**, 1190–1195 (2012).
- 470    21.    Feuer, K. L. *et al.* CRISPR Del/Rei: a simple, flexible, and efficient pipeline for scarless genome  
471            editing. *Sci. Reports* **2022 121 12**, 1–4 (2022).
- 472    22.    Das, D., Feuer, K., Wahbeh, M. & Avramopoulos, D. Modeling Psychiatric Disorder Biology with  
473            Stem Cells. *Curr. Psychiatry Rep.* **22**, (2020).
- 474    23.    Fisher, S. *et al.* Evaluating the biological relevance of putative enhancers using Tol2 transposon-

- 475 mediated transgenesis in zebrafish. *Nat. Protoc.* **1**, 1297–1305 (2006).
- 476 24. Fisher, S., Grice, E. A., Vinton, R. M., Bessling, S. L. & McCallion, A. S. Conservation of RET  
477 regulatory function from human to zebrafish without sequence similarity. *Science* **312**, 276–279  
478 (2006).
- 479 25. McGaughey, D. M. *et al.* Metrics of sequence constraint overlook regulatory sequences in an  
480 exhaustive analysis at *phox2b*. *Genome Res.* **18**, 252–260 (2008).
- 481 26. Ripke, S. *et al.* Biological insights from 108 schizophrenia-associated genetic loci. *Nature* **511**,  
482 421–427 (2014).
- 483 27. Myint, L. *et al.* A screen of 1,049 schizophrenia and 30 Alzheimer’s-associated variants for  
484 regulatory potential. *Am. J. Med. Genet. B. Neuropsychiatr. Genet.* **183**, 61 (2020).
- 485 28. Karlsson, J., Von Hofsten, J. & Olsson, P. E. Generating transparent zebrafish: a refined method to  
486 improve detection of gene expression during embryonic development. *Mar. Biotechnol. (NY)*. **3**,  
487 522–527 (2001).
- 488 29. Wahbeh, M. H. *et al.* A Missense Variant in CASKIN1’s Proline-Rich Region Segregates with  
489 Psychosis in a Three-Generation Family. *Genes (Basel)*. **14**, 177 (2023).
- 490 30. Yang, L. *et al.* Optimization of scarless human stem cell genome editing. *Nucleic Acids Res.* **41**,  
491 9049–9061 (2013).
- 492 31. Chambers, S. M. *et al.* Highly efficient neural conversion of human ES and iPS cells by dual  
493 inhibition of SMAD signaling. *Nat. Biotechnol.* **27**, 275–280 (2009).
- 494 32. Wen, Z. *et al.* Synaptic dysregulation in a human iPS cell model of mental disorders. *Nature* **515**,  
495 414–418 (2014).
- 496 33. Taylor, S. C. *et al.* The ultimate qPCR experiment: Producing publication quality, reproducible  
497 data the first time. *Trends Biotechnol.* **37**, 761–774 (2019).
- 498 34. Kim, D., Paggi, J. M., Park, C., Bennett, C. & Salzberg, S. L. Graph-Based Genome Alignment and

- 499 Genotyping with HISAT2 and HISAT-genotype. *Nat. Biotechnol.* **37**, 907 (2019).
- 500 35. Li, H. *et al.* The Sequence Alignment/Map format and SAMtools. *Bioinformatics* **25**, 2078 (2009).
- 501 36. Pertea, M. *et al.* StringTie enables improved reconstruction of a transcriptome from RNA-seq  
502 reads. *Nat. Biotechnol.* **33**, 290 (2015).
- 503 37. Pertea, M., Kim, D., Pertea, G. M., Leek, J. T. & Salzberg, S. L. Transcript-level expression analysis  
504 of RNA-seq experiments with HISAT, StringTie, and Ballgown. *Nat. Protoc.* **11**, 1650 (2016).
- 505 38. Love, M. I., Huber, W. & Anders, S. Moderated estimation of fold change and dispersion for RNA-  
506 seq data with DESeq2. *Genome Biol.* **15**, (2014).
- 507 39. Hochberg, Y. & Benjamini, Y. More powerful procedures for multiple significance testing. *Stat.*  
508 *Med.* **9**, 811–818 (1990).
- 509 40. Mi, H. *et al.* PANTHER version 16: a revised family classification, tree-based classification tool,  
510 enhancer regions and extensive API. *Nucleic Acids Res.* **49**, D394–D403 (2021).
- 511 41. Szklarczyk, D. *et al.* The STRING database in 2021: customizable protein-protein networks, and  
512 functional characterization of user-uploaded gene/measurement sets. *Nucleic Acids Res.* **49**,  
513 D605–D612 (2021).
- 514 42. Szklarczyk, D. *et al.* The STRING database in 2023: protein-protein association networks and  
515 functional enrichment analyses for any sequenced genome of interest. *Nucleic Acids Res.* **51**,  
516 D638–D646 (2023).
- 517 43. Hwang, J. Y. & Zukin, R. S. REST, a master transcriptional regulator in neurodegenerative disease.  
518 *Curr. Opin. Neurobiol.* **48**, 193 (2018).
- 519 44. Loe-Mie, Y. *et al.* SMARCA2 and other genome-wide supported schizophrenia-associated genes:  
520 regulation by REST/NRSF, network organization and primate-specific evolution. *Hum. Mol. Genet.*  
521 **19**, 2841–2857 (2010).
- 522 45. Ogawa, S. & Parhar, I. S. Role of Habenula in Social and Reproductive Behaviors in Fish:

- 523 Comparison With Mammals. *Front. Behav. Neurosci.* **15**, 818782 (2022).
- 524 46. Mathuru, A. S. & Jesuthasan, S. The medial habenula as a regulator of anxiety in adult zebrafish.  
525 *Front. Neural Circuits* **7**, 99 (2013).
- 526 47. Agetsuma, M. *et al.* The habenula is crucial for experience-dependent modification of fear  
527 responses in zebrafish. *Nat. Neurosci.* *2010 1311* **13**, 1354–1356 (2010).
- 528 48. Chou, M. Y. *et al.* Social conflict resolution regulated by two dorsal habenular subregions in  
529 zebrafish. *Science* **352**, 87–90 (2016).
- 530 49. Wee, C. L. *et al.* A bidirectional network for appetite control in larval zebrafish. *Elife* **8**, (2019).
- 531 50. Barrios, J. P., Wang, W. C., England, R., Reifenberg, E. & Douglass, A. D. Hypothalamic Dopamine  
532 Neurons Control Sensorimotor Behavior by Modulating Brainstem Premotor Nuclei in Zebrafish.  
533 *Curr. Biol.* **30**, 4606 (2020).
- 534 51. Pose-Méndez, S., Schramm, P., Valishetti, K. & Köster, R. W. Development, circuitry, and function  
535 of the zebrafish cerebellum. *Cell. Mol. Life Sci.* **80**, 227 (2023).
- 536 52. Hiyoshi, K. *et al.* Two-photon laser ablation and in vivo wide-field imaging of inferior olive  
537 neurons revealed the recovery of olivocerebellar circuits in zebrafish. *Int. J. Environ. Res. Public*  
538 *Health* **18**, 8357 (2021).
- 539 53. Zhang, L. *et al.* Altered Volume and Functional Connectivity of the Habenula in Schizophrenia.  
540 *Front. Hum. Neurosci.* **11**, 636 (2017).
- 541 54. Xue, K. *et al.* Altered static and dynamic functional connectivity of habenula in first-episode,  
542 drug-naïve schizophrenia patients, and their association with symptoms including hallucination  
543 and anxiety. *Front. Psychiatry* **14**, 1078779 (2023).
- 544 55. Bernstein, H. G., Keilhoff, G. & Steiner, J. The implications of hypothalamic abnormalities for  
545 schizophrenia. *Handb. Clin. Neurol.* **182**, 107–120 (2021).
- 546 56. Li, J. *et al.* Hypoactivity of the lateral habenula contributes to negative symptoms and cognitive

- 547 dysfunction of schizophrenia in rats. *Exp. Neurol.* **318**, 165–173 (2019).
- 548 57. Walker, E., Mittal, V. & Tessner, K. Stress and the Hypothalamic Pituitary Adrenal Axis in the  
549 Developmental Course of Schizophrenia. *Annu. Rev. Clin. Psychol.* **4**, 189–216 (2008).
- 550 58. Andreasen, N. C. & Pierson, R. The Role of the Cerebellum in Schizophrenia. *Biol. Psychiatry* **64**,  
551 81 (2008).
- 552 59. Kruse, A. O. & Bustillo, J. R. Glutamatergic dysfunction in Schizophrenia. *Transl. Psychiatry* **2022**  
553 *121* **12**, 1–13 (2022).
- 554 60. McCutcheon, R. A., Krystal, J. H. & Howes, O. D. Dopamine and glutamate in schizophrenia:  
555 biology, symptoms and treatment. *World Psychiatry* **19**, 15 (2020).
- 556 61. Väisänen, J., Ihalainen, J., Tanila, H. & Castrén, E. Effects of NMDA-receptor antagonist treatment  
557 on c-fos expression in rat brain areas implicated in schizophrenia. *Cell. Mol. Neurobiol.* **24**, 769–  
558 780 (2004).
- 559 62. Jahangir, M., Zhou, J. S., Lang, B. & Wang, X. P. GABAergic System Dysfunction and Challenges in  
560 Schizophrenia Research. *Front. Cell Dev. Biol.* **9**, 663854 (2021).
- 561 63. Rund, B. R. The research evidence for schizophrenia as a neurodevelopmental disorder. *Scand. J.*  
562 *Psychol.* **59**, 49–58 (2018).
- 563 64. Birnbaum, R. & Weinberger, D. R. Genetic insights into the neurodevelopmental origins of  
564 schizophrenia. *Nat. Rev. Neurosci.* **18**, 727–740 (2017).
- 565 65. Duman, J. G. *et al.* The adhesion-GPCR BAI1 regulates synaptogenesis by controlling the  
566 recruitment of the Par3/Tiam1 polarity complex to synaptic sites. *J. Neurosci.* **33**, 6974–6978  
567 (2013).
- 568 66. Feuer, K. L., Peng, X., Yovo, C. K. & Avramopoulos, D. DPYSL2/CRMP2 isoform B knockout in  
569 human iPSC-derived glutamatergic neurons confirms its role in mTOR signaling and  
570 neurodevelopmental disorders. *Mol. Psychiatry* (2023) doi:10.1038/S41380-023-02186-W.



- 571 67. Zhang, S. *et al.* Multiple genes in a single GWAS risk locus synergistically mediate aberrant  
572 synaptic development and function in human neurons. *Cell genomics* **3**, (2023).
- 573 68. Broadway, B. J. *et al.* Systematic Functional Analysis of PINK1 and PRKN Coding Variants. *Cells* **11**,  
574 (2022).
- 575 69. Li, Y. *et al.* Regulatory Variant rs2535629 in ITIH3 Intron Confers Schizophrenia Risk By Regulating  
576 CTCF Binding and SFMBT1 Expression. *Adv. Sci. (Weinheim, Baden-Wuerttemberg, Ger.)* **9**, (2022).
- 577 70. Hoedjes, K. M., Kostic, H., Flatt, T. & Keller, L. A Single Nucleotide Variant in the PPAR $\gamma$ -homolog  
578 Eip75B Affects Fecundity in *Drosophila*. *Mol. Biol. Evol.* **40**, (2023).
- 579 71. Weng, Z. *et al.* Structure of BAI1/ELMO2 complex reveals an action mechanism of adhesion  
580 GPCRs via ELMO family scaffolds. *Nat. Commun.* **10**, (2019).
- 581 72. Hamanaka, K. *et al.* Large-scale discovery of novel neurodevelopmental disorder-related genes  
582 through a unified analysis of single-nucleotide and copy number variants. *Genome Med.* **14**,  
583 (2022).
- 584 73. Shiu, F. H. *et al.* Mice lacking full length *Adgrb1* (*Bai1*) exhibit social deficits, increased seizure  
585 susceptibility, and altered brain development. *Exp. Neurol.* **351**, (2022).
- 586 74. Duman, J. G. *et al.* The adhesion-GPCR BAI1 shapes dendritic arbors via Bcr-mediated RhoA  
587 activation causing late growth arrest. *Elife* **8**, (2019).
- 588 75. Duman, J. G., Tu, Y. K. & Tolia, K. F. Emerging Roles of BAI Adhesion-GPCRs in Synapse  
589 Development and Plasticity. *Neural Plast.* **2016**, (2016).
- 590 76. Zhu, D. *et al.* BAI1 regulates spatial learning and synaptic plasticity in the hippocampus. *J. Clin.*  
591 *Invest.* **125**, 1497–1508 (2015).
- 592 77. Sleiman, P. *et al.* GWAS meta analysis identifies TSNARE1 as a novel Schizophrenia / Bipolar  
593 susceptibility locus. *Sci. Rep.* **3**, (2013).
- 594 78. Plooster, M. *et al.* Schizophrenia-Linked Protein tSNARE1 Regulates Endosomal Trafficking in

- 595           Cortical Neurons. *J. Neurosci.* **41**, 9466–9481 (2021).
- 596   79.   Hancock, E. J., Ang, J., Papachristodoulou, A. & Stan, G. B. The Interplay between Feedback and  
597           Buffering in Cellular Homeostasis. *Cell Syst.* **5**, 498-508.e23 (2017).
- 598   80.   Liu, C., Everall, I., Pantelis, C. & Bousman, C. Interrogating the Evolutionary Paradox of  
599           Schizophrenia: A Novel Framework and Evidence Supporting Recent Negative Selection of  
600           Schizophrenia Risk Alleles. *Front. Genet.* **10**, (2019).
- 601   81.   Akingbuwa, W. A., Hammerschlag, A. R., Bartels, M., Nivard, M. G. & Middeldorp, C. M. Ultra-rare  
602           and common genetic variant analysis converge to implicate negative selection and neuronal  
603           processes in the aetiology of schizophrenia. *Mol. Psychiatry* **27**, 3699–3707 (2022).
- 604   82.   Bassett, A. S., Bury, A., Hodgkinson, K. A. & Honer, W. G. Reproductive fitness in familial  
605           schizophrenia. *Schizophr. Res.* **21**, 151–160 (1996).
- 606   83.   Avila, M., Thaker, G. & Adami, H. Genetic epidemiology and schizophrenia: A study of  
607           reproductive fitness. *Schizophr. Res.* **47**, 233–241 (2001).
- 608

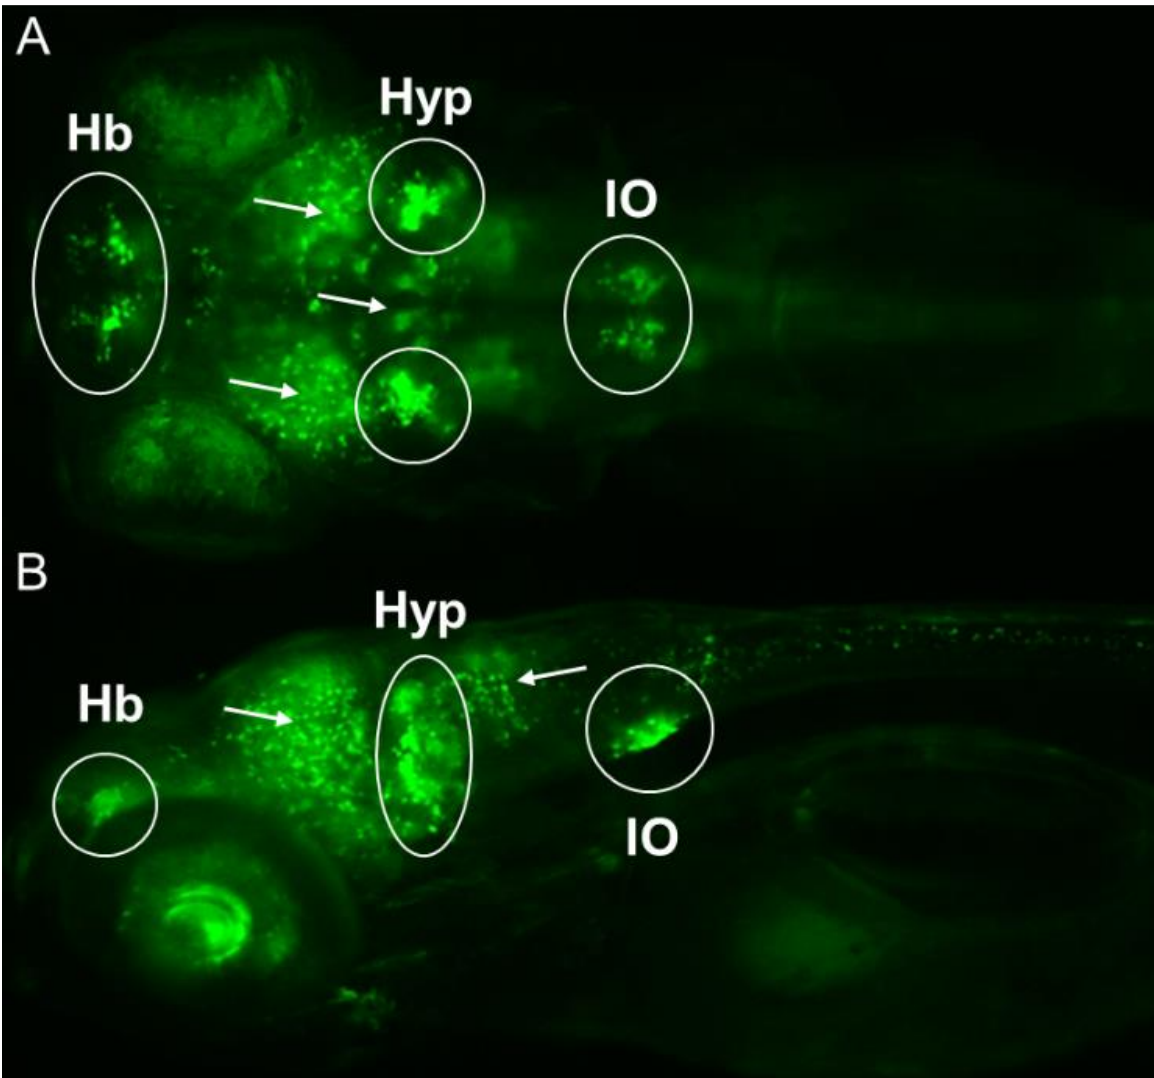

**Figure 1.** A noncoding REST/NRSF TF binding sequence containing rs4129585 drives reporter expression in F<sub>2</sub> zebrafish embryos 6 d.p.f. **(A)** Dorsal and **(B)** lateral views of a representative zebrafish embryo with GFP expression patterns in the habenula (Hb), hypothalamus (Hyp), and inferior olive (IO), as well as glutamatergic neurotransmitters (arrows).

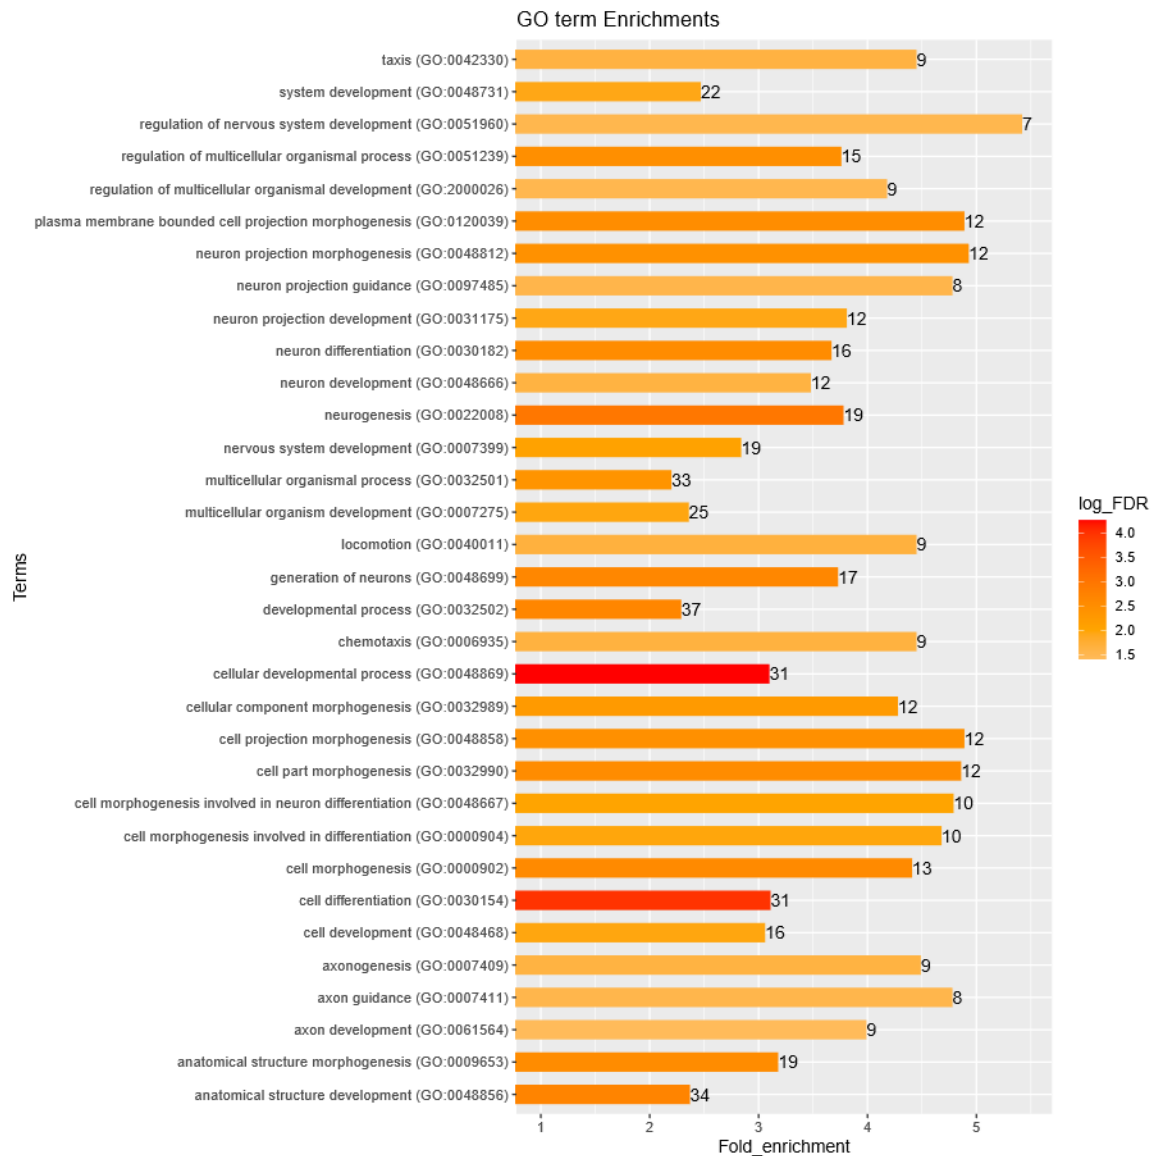

**Figure 2.** GO terms for functional enrichments among DE genes reported by PANTHER. Bar color indicates level of statistical significance (log<sub>FDR</sub>; false discovery rate), numbers indicate the number of genes enriched in the pathway, and bar length indicates the fold enrichment of the genes observed in our uploaded list over the expected representation of genes in each GO category.

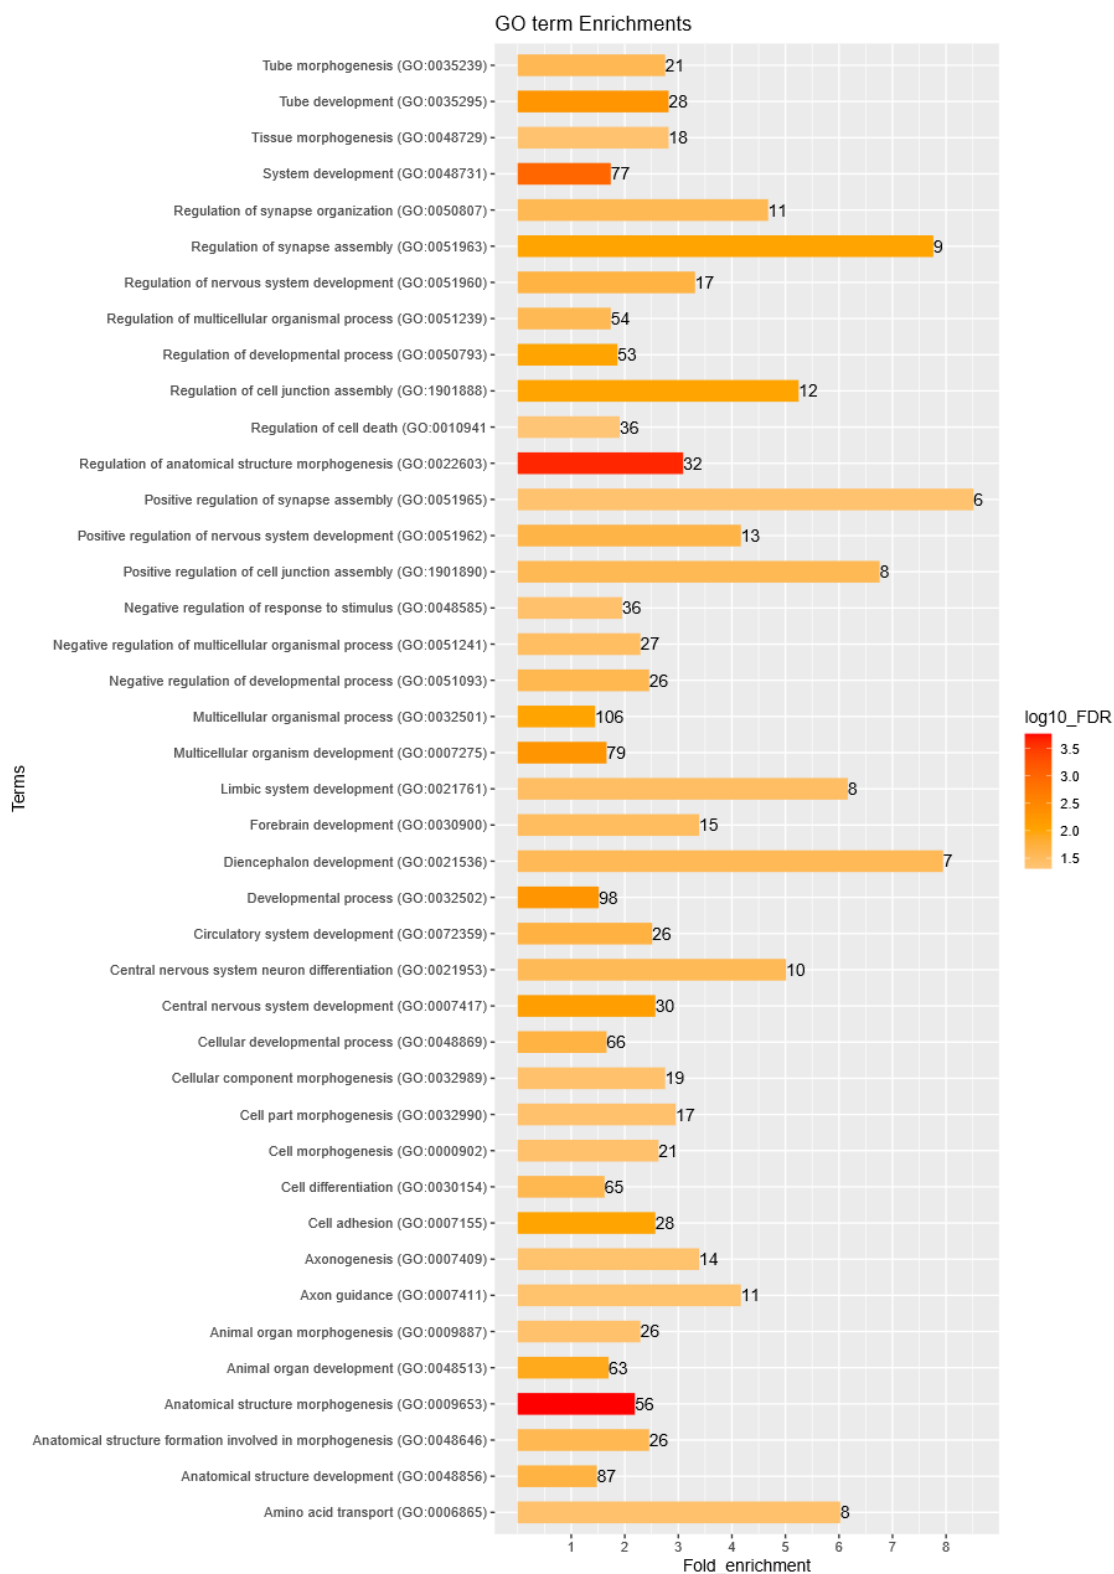

**Figure 3.** GO terms for functional enrichment within the STRING network of interacting proteins identified from our DR genes. Bar color indicates level of statistical significance, numbers indicate the number of genes enriched in the network, and bar length indicates the fold enrichment of the genes observed in our uploaded list over the expected representation of genes in each GO category.

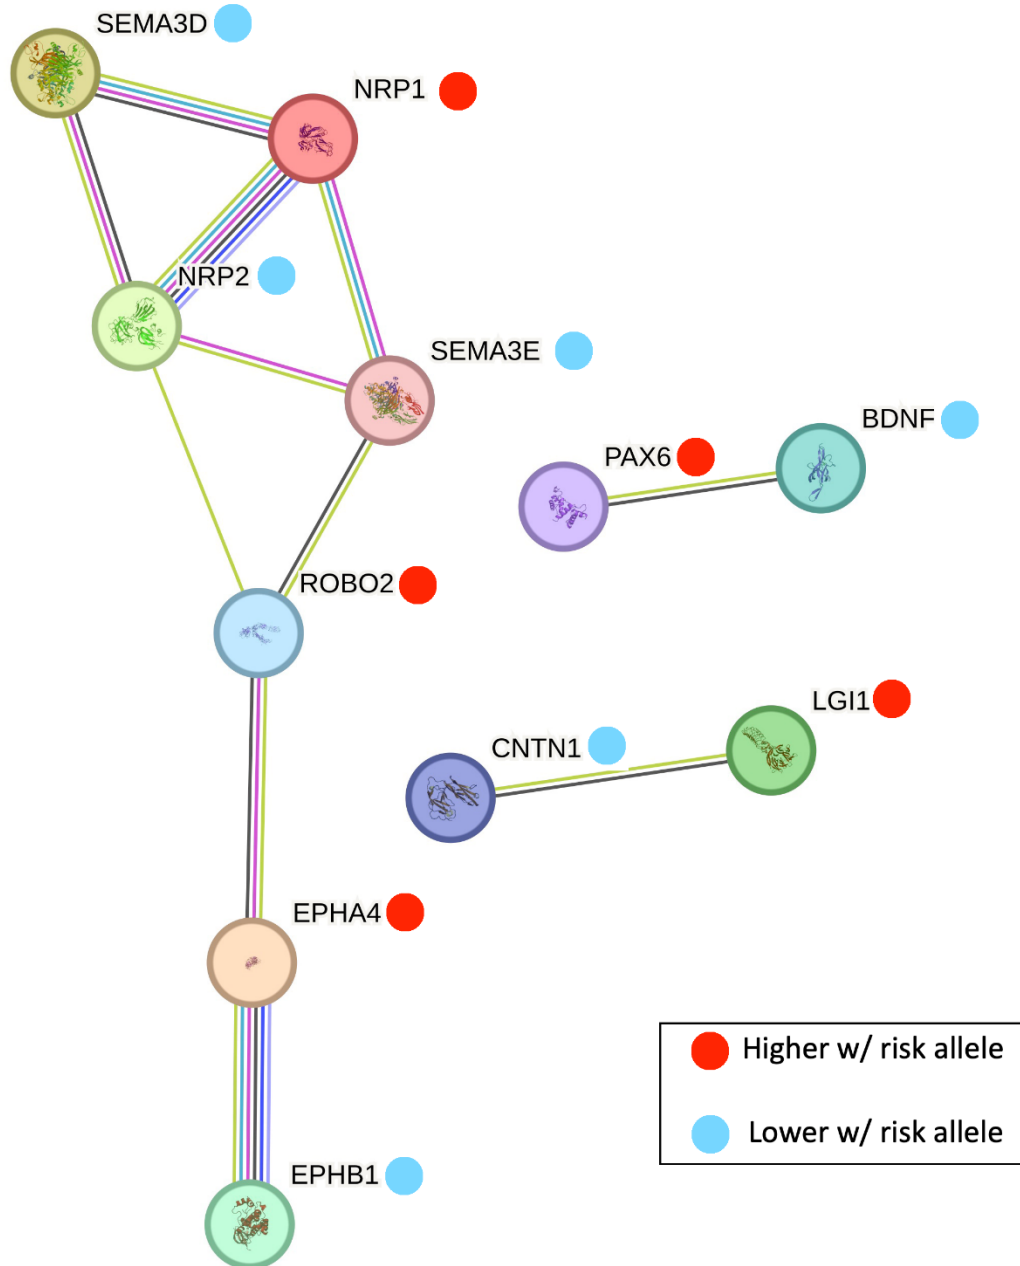

**Figure 4.** The 11 axon guidance genes in the STRING network of DE genes. Blue dots indicate proteins in the network whose genes are downregulated in the NPCs containing the risk allele, and red dots indicate proteins in the network whose genes are upregulated in the NPCs containing the risk allele. Image generated by the STRING website.
